# Supplementary material for: Ineffectiveness of the 2014-2015 H3N2 influenza vaccine
Source: PubMed Central journal article supplement (PMC4811452; doi:10.18632/oncotarget.6746), 2015-12-23
Supplement: oncotarget-07-1185-s001.pdf [file oncotarget-07-1185-s001.pdf]

## Ineffectiveness of the 2014-2015 H3N2 influenza vaccine

### Supplementary Material

**Supplementary Table 1: data related to figure 3A**

| Symptoms             | Vaccinated    |                     | Unvaccinated   |                     |
|----------------------|---------------|---------------------|----------------|---------------------|
|                      | Number (n=33) | Percent (95%CI)     | Number (n=143) | Percent (95%CI)     |
| Fever                | 29            | 87.88 (72.67-95.18) | 136            | 95.1(90.24-97.61)   |
| Weakness             | 23            | 69.7 (52.66- 82.62) | 95             | 66.43 (58.35-73.65) |
| Headache             | 19            | 57.58 (40.81-72.76) | 77             | 53.85 (44.68-61.81) |
| Muscle aches         | 14            | 42.42 (27.24-59.19) | 69             | 48.25 (40.22-56.38) |
| Joint pain           | 8             | 24.24 (12.83-41.02) | 21             | 14.69 (9.81-21.41)  |
| shiver               | 15            | 45.45 (29.84-62.01) | 41             | 28.67 (21.89-36.56) |
| Diarrhea             | 1             | 3.03 (0.54-15.32)   | 7              | 4.9 (2.39-9.76)     |
| Vomiting /<br>nausea | 5             | 15.1 (6.65-30.92)   | 22             | 15.36 (10.38-22.2)  |
| Cough                | 29            | 87.88 (72.67-95.18) | 111            | 77.62 (70.12-83.68) |
| Sore throat          | 16            | 48.48 (32.5-64.78)  | 85             | 59.44 (51.25-67.14) |
| Red throat           | 10            | 30.3 (17.38-47.34)  | 44             | 30.77 (23.79-38.75) |
| Rhinitis             | 24            | 72.73 (55.78-84.93) | 102            | 71.33 (66.44-78.11) |
| dyspnea              | 3             | 9.09 (3.14-23.17)   | 6              | 4.2 (1.94-8.85)     |

Supplementary Table 2: Data for Figure 3B

| <b>Age</b>    | <b>Vaccinated</b>    |                        | <b>Unvaccinated</b>   |                        |
|---------------|----------------------|------------------------|-----------------------|------------------------|
|               | <b>Number (n=44)</b> | <b>Percent (95%CI)</b> | <b>Number (n=167)</b> | <b>Percent (95%CI)</b> |
| <b>0-2</b>    | 1                    | 2.27 (0.4-11.81)       | 3                     | 1.8 (0.61-5.15)        |
| <b>2-5</b>    | 3                    | 6.82 (2.35-18.23)      | 11                    | 6.59 (3.72-11.41)      |
| <b>5-10</b>   | 13                   | 29.55 (18.16-44.22)    | 43                    | 25.75 (19.71-32.87)    |
| <b>10-20</b>  | 10                   | 22.73 (12.84-36.99)    | 56                    | 33.53 (26.81-40.49)    |
| <b>20-40</b>  | 7                    | 15.91 (7.93-29.37)     | 31                    | 18.56 (13.4-25.14)     |
| <b>40-65</b>  | 6                    | 13.64 (6.4-26.71)      | 21                    | 12.57 (8.37-18.46)     |
| <b>&gt;65</b> | 4                    | 9.09 (3.59-21.16)      | 2                     | 1.2 (0.33-4.26)        |
